# Supplementary material for: Preparation of Resistant Starch Types III + V with Moderate Amylopullulanase and Its Effects on Bread Properties
Source: MDPI journal article supplement (doi:10.3390/foods13081251), 2024-04-19

## Supplementary material

**Table S1.** The resistant starch content of starch samples

| Samples                      | PSn                  | PSa                  | PSpa                  |
|------------------------------|----------------------|----------------------|-----------------------|
| Resistant starch content (%) | 8.2±0.2 <sup>a</sup> | 8.9±0.2 <sup>a</sup> | 29.8±0.7 <sup>b</sup> |

a, b, Different letters are significantly different ( $P < 0.05$ ).

PSn, Native pea starch; PSa, Pea starch treated with autoclaving; PSpa, Pea starch treated with debranching and autoclaving.

**Figure S1.** SEM images of native and treated pea starches. PSn, Native pea starch; PSa, Pea starch treated with autoclaving; PSpa, Pea starch treated with debranching and autoclaving.

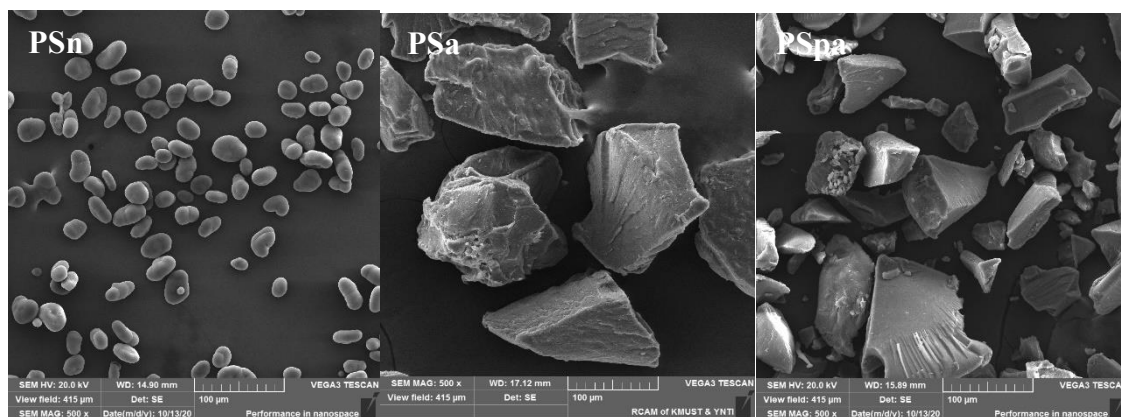

**Figure S2.** The hardness changes of bread samples during storage time.

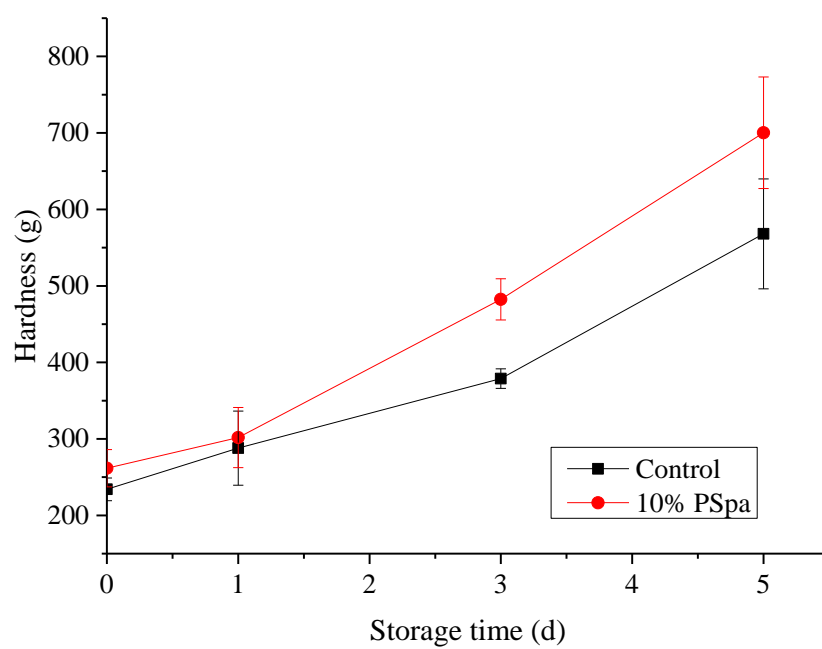

Supplement: s1 [file s1]
